# Supplementary material
Source: PubMed Central journal article supplement (PMC5512896)
Supplement: NIHMS767939-supplement-1.pdf [file NIHMS767939-supplement-1.pdf]

## Supplementary Table 1. Response rates of pain intensity and frequency questions of the OPAS.

| PAIN INTENSITY QUESTIONS |                               |                                 |                                |                                  |                                  |                                    |                                   |                                     |
|--------------------------|-------------------------------|---------------------------------|--------------------------------|----------------------------------|----------------------------------|------------------------------------|-----------------------------------|-------------------------------------|
|                          | EYE PAIN                      |                                 |                                |                                  |                                  |                                    | NON-EYE PAIN                      |                                     |
|                          | Most Eye Pain in the past 24h | Most Eye Pain in the past 2 wks | Least Eye Pain in the past 24h | Least Eye Pain in the past 2 wks | Average Eye Pain in the past 24h | Average Eye pain in the past 2 wks | Most Non-Eye Pain in the past 24h | Most Non-Eye Pain in the past 2 wks |
| <b>N (attempted)</b>     | 101                           | 95                              | 102                            | 93                               | 102                              | 91                                 | 95                                | 88                                  |
| <b>N (total)</b>         | 102                           | 102                             | 102                            | 102                              | 102                              | 102                                | 102                               | 102                                 |

| PAIN FREQUENCY QUESTIONS |                                       |                                           |                                         |                                             |
|--------------------------|---------------------------------------|-------------------------------------------|-----------------------------------------|---------------------------------------------|
|                          | Frequency of Eye Pain in the past 24h | Frequency of Non-Eye Pain in the past 24h | Frequency of Eye Pain in the past 2 wks | Frequency of Non-Eye Pain in the past 2 wks |
| <b>N (attempted)</b>     | 41                                    | 22                                        | 48                                      | 23                                          |
| <b>N (total)</b>         | 102                                   | 102                                       | 102                                     | 102                                         |

**Supplementary Table 1. Response rates of pain intensity and frequency questions of the OPAS.** All pain intensity questions had high response rates ranging from (86.3% to 100%), whereas the pain frequency questions had very low response rates (22.3% to 47.1% ) suggestive of poor question design.
