# Supplementary material
Source: PubMed Central journal article supplement (PMC5512896)
Supplement: NIHMS767939-supplement-2.pdf [file NIHMS767939-supplement-2.pdf]

## Supplementary Table 2. Response rates of non-pain intensity questions of the OPAS

| QoL QUESTIONS        |                        |                       |                  |      |       |                       |                         |
|----------------------|------------------------|-----------------------|------------------|------|-------|-----------------------|-------------------------|
|                      | Reading & computer use | Driving & watching TV | General activity | Mood | Sleep | Relationships in life | Thinking about eye pain |
| <b>N (attempted)</b> | 89                     | 86                    | 83               | 86   | 85    | 84                    | 91                      |
| <b>N (total)</b>     | 102                    | 102                   | 102              | 102  | 102   | 102                   | 102                     |

| AGGRAVATING FACTORS  |                           |                    | ASSOCIATED SYMPTOMS |         |                      |         | SYMPTOM RELIEF |              |
|----------------------|---------------------------|--------------------|---------------------|---------|----------------------|---------|----------------|--------------|
|                      | Wind/Dry Air/Heat/Air Con | Volatile Chemicals | Redness             | Burning | Sensitivity to light | Tearing | Eye pain       | Non-eye pain |
| <b>N (attempted)</b> | 94                        | 86                 | 89                  | 86      | 88                   | 88      | 19             | 13           |
| <b>N (total)</b>     | 102                       | 102                | 102                 | 102     | 102                  | 102     | 21             | 21           |

**Supplementary Table 2. Response rates of non-pain intensity questions of the OPAS.** Response rates for all other domains of the OPAS suggested good question design and comprehension with response rates ranging from 81.4% to 92.2% for all eye pain-related questions.
